# Supplementary material
Source: publisher figshare collection journal article supplement (https://acs.figshare.com/ndownloader/files/20308659)
Supplement: Supplementary file 1 [file 20308659]

# Supporting Information

## Bifacial, Color-Tunable Semitransparent Perovskite Solar Cells for Building Integrated Photovoltaics

*Hao Wang,<sup>‡</sup> Herlina Arianita Dewi,<sup>‡</sup> Teck Ming Koh,<sup>‡</sup> Annalisa Bruno,<sup>\*‡</sup> Subodh  
Mhaisalkar,<sup>‡,§</sup> and Nripan Mathews<sup>\*‡,§</sup>*

<sup>‡</sup>Energy Research Institute @ NTU (ERI@N), Nanyang Technological University, Singapore  
637553

<sup>§</sup>School of Materials Science & Engineering, Nanyang Technological University, Singapore  
639798

**Corresponding Author**

[\\*annalisa@ntu.edu.sg](mailto:*annalisa@ntu.edu.sg); [Nripan@ntu.edu.sg](mailto:Nripan@ntu.edu.sg),

**Table S1.** Summary of colourful opaque and semi-transparent (Semi-T) perovskite solar cells.

| Opaque/<br>Semi-T | Structure | Color generation                                                                                                                                                                                  | Detail structure                                                                                                                                       | Color tunability                             | PCE                                  | Ref |
|-------------------|-----------|---------------------------------------------------------------------------------------------------------------------------------------------------------------------------------------------------|--------------------------------------------------------------------------------------------------------------------------------------------------------|----------------------------------------------|--------------------------------------|-----|
| Opaque            | p-i-n     | Reflective color from rear Al side, perovskite's domain grain structure generates vivid ring color                                                                                                | ITO glass/PTAA/CH <sub>3</sub> NH <sub>3</sub> PbI <sub>3</sub> /PCBM/C <sub>60</sub> /BCP/Al                                                          | vivid color with ring patterns               | 12.2% (illumination from front side) | [1] |
| opaque            | n-i-p     | Reflective color from front FTO side, using porous photonic crystal                                                                                                                               | FTO glass/TiO <sub>2</sub> -SiO <sub>2</sub> NPs alternated layers/CH <sub>3</sub> NH <sub>3</sub> PbI <sub>3</sub> -xCl <sub>x</sub> /spiro-OMeTAD/Au | red, orange, green, green-blue, blue         | 4.5% (red) to 8.8% (blue)            | [2] |
| opaque            | n-i-p     | Reflective color from front FTO side, using luminescent down-shifting (LDS) layers                                                                                                                | LDS layer/FTO glass/TiO <sub>2</sub> /perovskite/spiro/Au                                                                                              | red (with efficiency), other colors on-going | 9.4% (red)                           | [3] |
| opaque            | p-i-n     | reflective color from front ITO side, Localized resonances in ultrathin metal nano-strip optical resonators consisting of an array of metallic subwavelength nanowires on a transparent substrate | Ag nano figures patterned nanoresonators/ITO glass/NiO <sub>x</sub> /CH <sub>3</sub> NH <sub>3</sub> PbI <sub>3</sub> /PCBM/ZnO/Al(80nm)               | red, green, blue                             | 7.72% (blue) to 10.12% (red)         | [4] |
| Semi-T            | n-i-p     | Transmissive color, microstructured arrays of perovskite "islands"                                                                                                                                | FTO glass/TiO <sub>2</sub> /perovskite/spiro-OMeTAD/thin Au (10nm)                                                                                     | Neutral color                                | 5% to 11% for different AVT          | [5] |
| Semi-T            | n-i-p     | Transmissive color, perovskite thickness tuning                                                                                                                                                   | ITO glass/PCBM/CH <sub>3</sub> NH <sub>3</sub> PbI <sub>3</sub> /spiro-OMeTAD/MoO <sub>3</sub> /Ag/MoO <sub>3</sub>                                    | Brownish color                               | 3.5% to 9.23%                        | [6] |
| Semi-T            | p-i-n     | transmissive color, tune perovskite thickness                                                                                                                                                     | ITO glass/PEDOT or CuSCN/CH <sub>3</sub> NH <sub>3</sub> PbI <sub>3</sub> /PCBM/Bis-C <sub>60</sub> /Ag (20nm)                                         | Brown-orange                                 | 7.53% to 10.73%                      | [7] |
| Semi-T            | p-i-n     | Transmissive color, optical cavity (Ag/WO <sub>3</sub> /Ag, tune WO <sub>3</sub> thickness)                                                                                                       | ITO glass/PEDOT:PSS/PCBM/PTCBI/Ag/WO <sub>3</sub> /PTCBI/Ag                                                                                            | blue, green, red                             | 3.18% (green) to 3.86% (red)         | [8] |

|        |       |                                                                                                                                                |                                                                                                                                                           |                                                                             |                                             |      |
|--------|-------|------------------------------------------------------------------------------------------------------------------------------------------------|-----------------------------------------------------------------------------------------------------------------------------------------------------------|-----------------------------------------------------------------------------|---------------------------------------------|------|
| Semi-T | p-i-n | Transmissive color, optical cavity (Ag/ITO/Ag, tune ITO thickness)                                                                             | ITO glass/PEDOT:PSS/Perovskite/PCBM/Ag/ITO/Ag                                                                                                             | reddish-orange, yellow, yellow-green, yellowish-green, green, greenish-blue | 5.7% (blue) to 7.2% (yellow, orange)        | [9]  |
| Semi-T | n-i-p | transmissive color, multilayer dielectric mirror (TiO <sub>2</sub> -SiO <sub>2</sub> multilayers), tune incident angle                         | glass/TiO <sub>2</sub> -SiO <sub>2</sub> multilayers/ITO(200 nm)/CH <sub>3</sub> NH <sub>3</sub> PbI <sub>3</sub> /PCBM/ZnO NPs/ITO                       | cyan, violet, magenta, orange, red                                          | 10.12% (max)                                | [10] |
| Semi-T | p-i-n | transmissive color, based on phase-compensated optical microcavities (Ag/SiO <sub>2</sub> /ZnS/Ag/ZnS, tune middle ZnS cavity layer thickness) | ITO glass/NiO <sub>x</sub> /CH <sub>3</sub> NH <sub>3</sub> PbI <sub>3</sub> /PCBM/BCP/Ag/SiO <sub>2</sub> /ZnS/Ag/ZnS                                    | red, green, blue                                                            | 10.47% (red), 10.66% (green), 11.18% (blue) | [11] |
| Semi-T | n-i-p | Reflective color from PEDOT side, transfer-printed PEDOT:PSS layer thickness tuning                                                            | glass/FTO/c-TiO <sub>2</sub> /m-TiO <sub>2</sub> /CH <sub>3</sub> NH <sub>3</sub> PbI <sub>3</sub> -xCl <sub>x</sub> /HTL(spiro-OMeTAD or P3HT)/PEDOT:PSS | Almost across entire visible spectrum                                       | best 13.8% (green-yellow) for PEDOT side    | [12] |
| Semi-T | p-i-n | reflective color, via separated Dielectric Mirrors deposited on microscope glass                                                               | ITO glass/PEDOT:PSS/Perovskite/PCBM/ZnO/AgNW/dielectric mirror                                                                                            | red, dark blue, light blue, neutral transparent                             | 3% to 3.6%                                  | [13] |

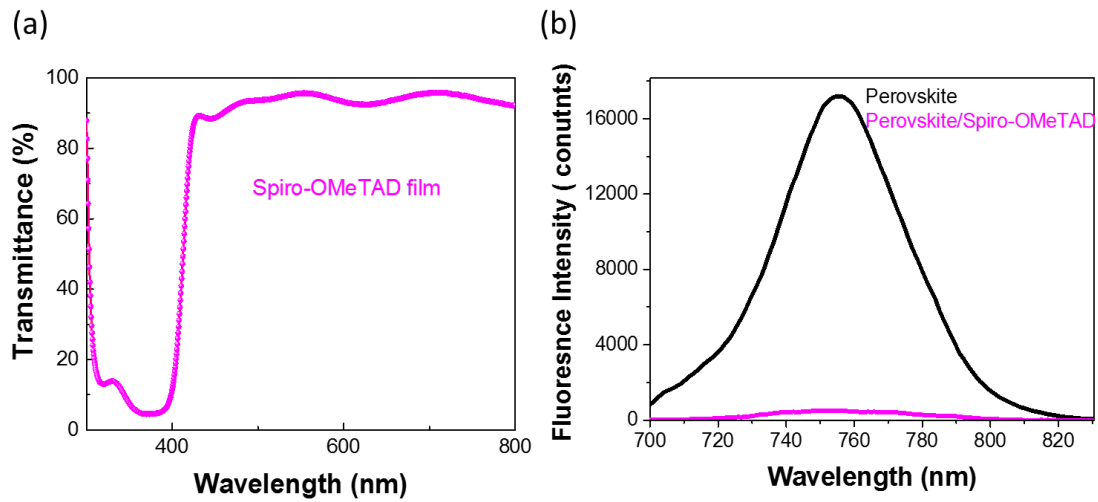

**Figure S1:** (a) Transmittance spectrum of Spiro-OMeTAD films, and (b) Steady-state photoluminescence spectra of perovskite films with and without HTM (Spiro-OMeTAD).

**Table S2** Steady-state photoluminescence quenching efficiency of perovskite films with CuSCN or Spiro-OMeTAD as HTM.

| Sample                  | PL Quenching Efficiency |
|-------------------------|-------------------------|
| Perovskite/CuSCN        | 0.90                    |
| Perovskite/Spiro-OMeTAD | 0.97                    |

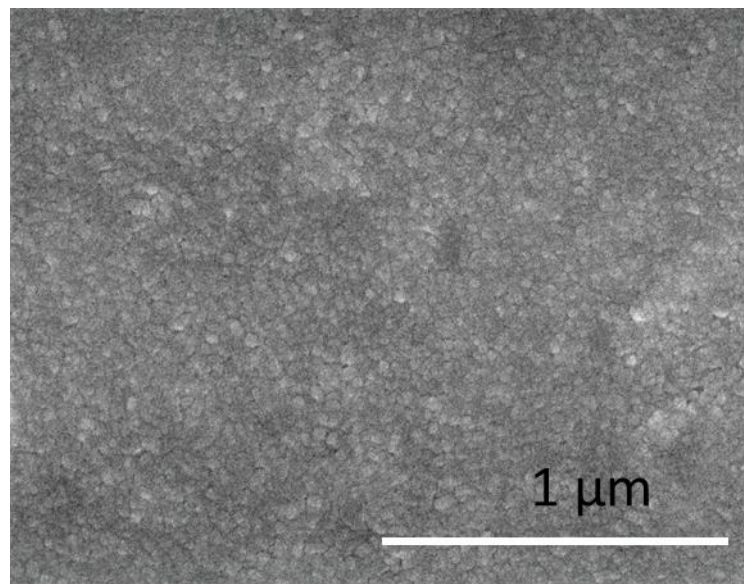

**Figure S2:** Top-view FESEM image of CuSCN film coated on top of perovskite layer

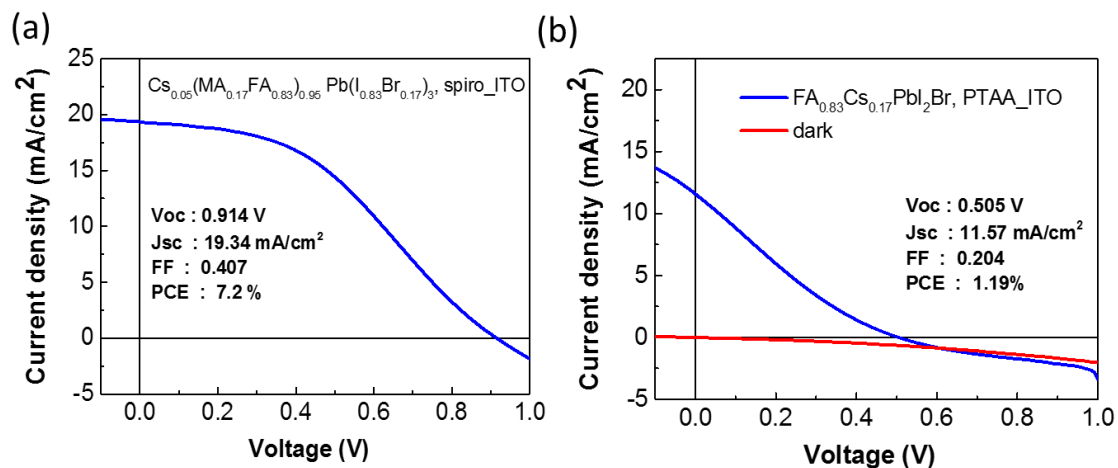

**Figure S3:** J-V characteristics of semi-transparent cells based on different perovskite absorber and HTMs using direct sputtered ITO as rear transparent electrode. (a)  $\text{Cs}_{0.05}(\text{MA}_{0.17}\text{FA}_{0.83})_{0.95}\text{Pb}(\text{I}_{0.83}\text{Br}_{0.17})_3$  as absorber, Spiro-OMeTAD as HTM, (b)  $\text{FA}_{0.83}\text{Cs}_{0.17}\text{PbI}_2\text{Br}$  (Bandgap is  $\sim 1.72$  eV) as absorber, PTAA as HTM.

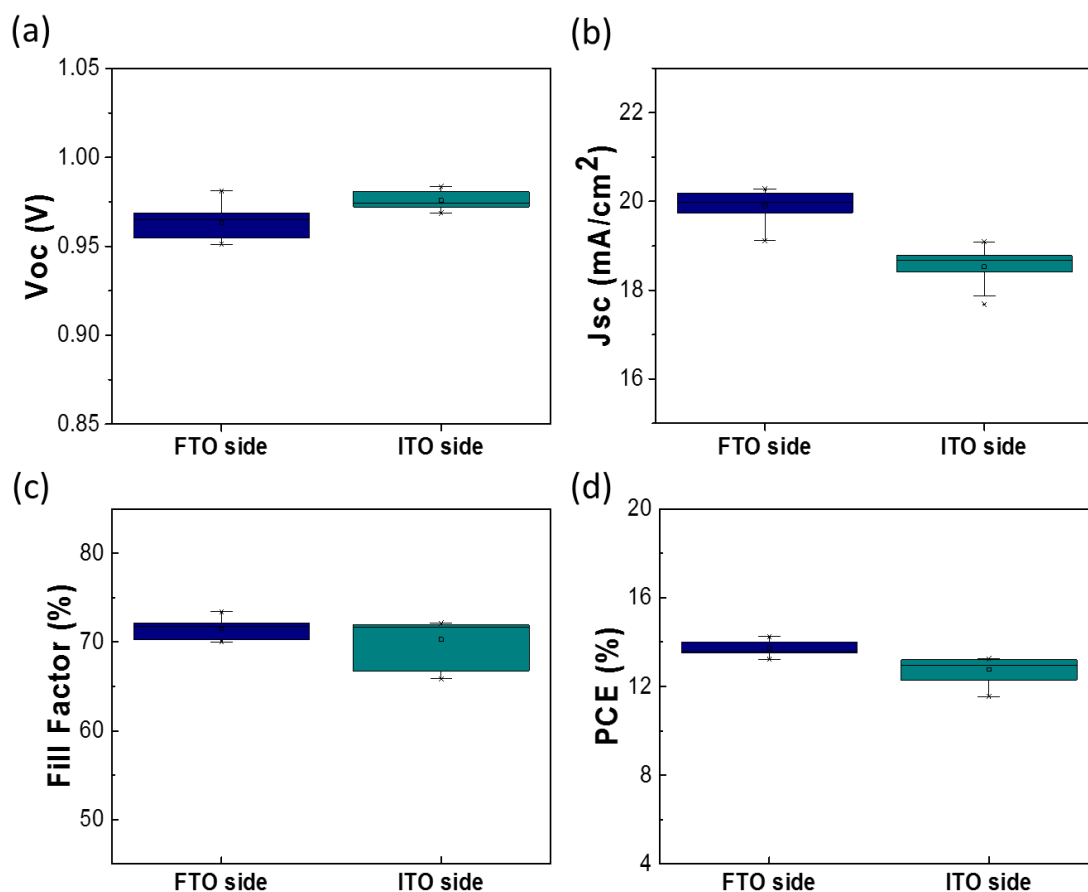

**Figure S4:** Statistics of photovoltaic characteristics of bifacial ST-PSCs using CuSCN as HTM. (a)  $V_{oc}$ , (b)  $J_{sc}$ , (c) fill factor, (d) PCE. (FTO side: ST-PSCs tested with light

illumination from front FTO side; ITO side: ST-PSCs tested with light illumination from rear ITO (back) side.

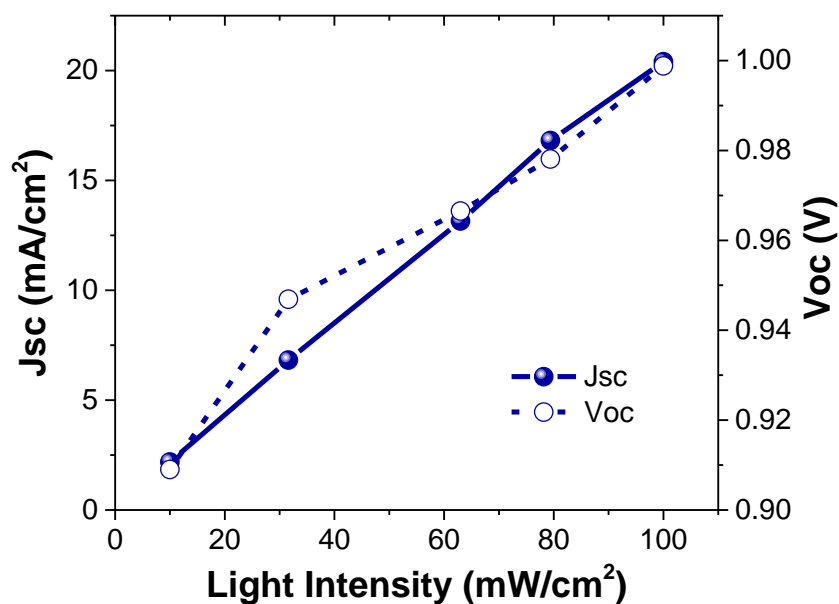

**Figure S5:** Photocurrent density (solid line and symbol) and Photovoltage (dashed line and open symbol) as a function of light intensity of CuSCN based PSC.

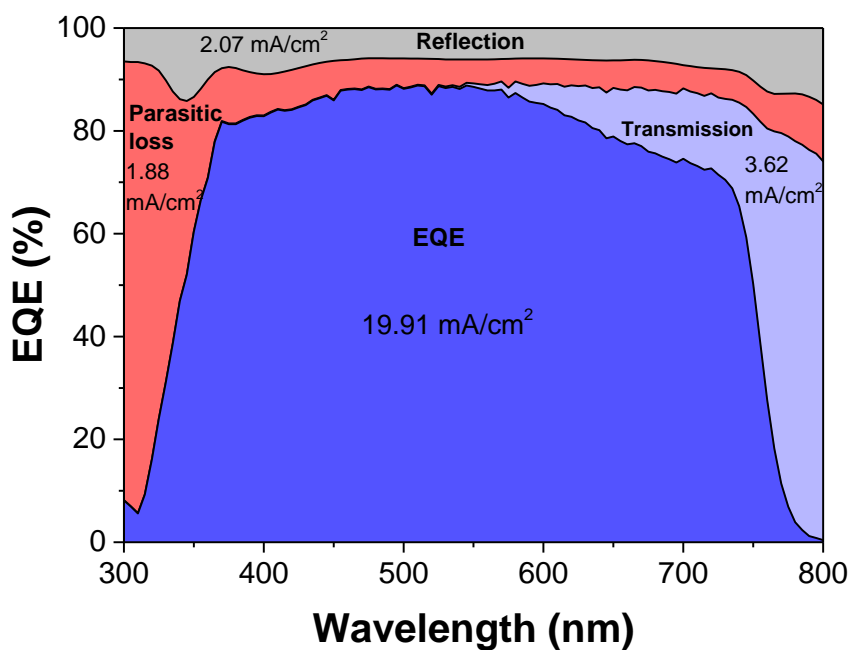

**Figure S6:** Optical analysis of the CuSCN ST-PSCs: EQE spectra, reflection, transmission and parasitic losses in CuSCN based ST-PSC illuminated from front FTO side. No anti-reflection coating (ARC) is applied on FTO substrate. There is about 6 % reflection loss in the visible region for the bifacial ST-PSCs, giving rise to a photocurrent loss of 2.07 mA/cm<sup>2</sup> for 300-800nm.

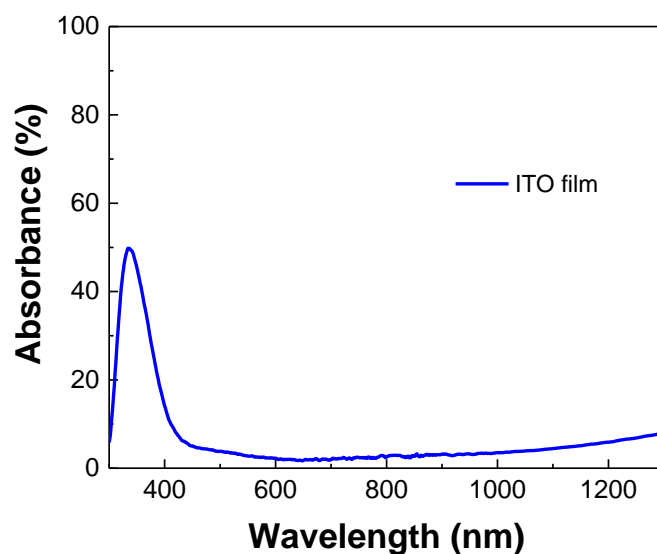

**Figure S7:** Absorbance of ITO film deposited on glass excluding the glass absorption.

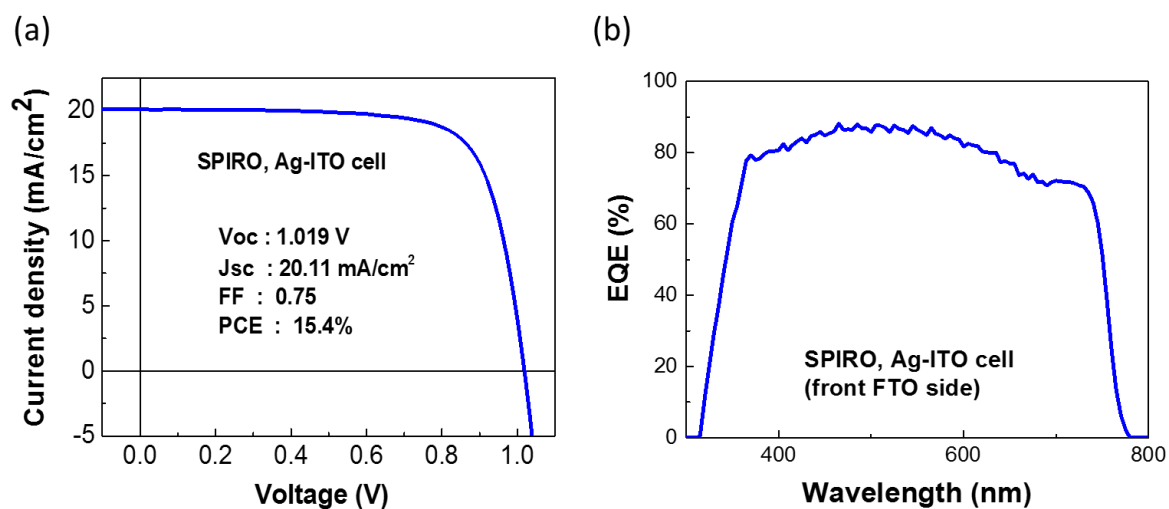

**Figure S8:** (a) Current-voltage (J-V) curves under 1-sun illumination and (b) EQE spectra of bifacial ST-PSC based on Spiro-OMeTAD. A thin Ag layer (1nm) was used as buffer layer prior to ITO sputtering deposition to protect the underlying layers from the sputter damage.

**Table S3** Testing details of bifacial performance measurement of ST-PSCs. The background reflection with White Paper as back reflector is evaluated by using a power meter to measure the reflected light intensity from backside. The reflection albedo (RA) was obtained as the ratio between the background reflection and the standard 1 SUN illumination.

|                                | Power (@550nm), using<br>power meter | Calculated Reflection Albedo(RA),<br>using white paper |
|--------------------------------|--------------------------------------|--------------------------------------------------------|
| 1 SUN, calibration             | 103.0 mW                             |                                                        |
| With white paper,<br>D =1.5 cm | 34.7 mW                              | 33.7%                                                  |
| With white paper,<br>D =3cm    | 56.0 mW                              | 54.4%                                                  |

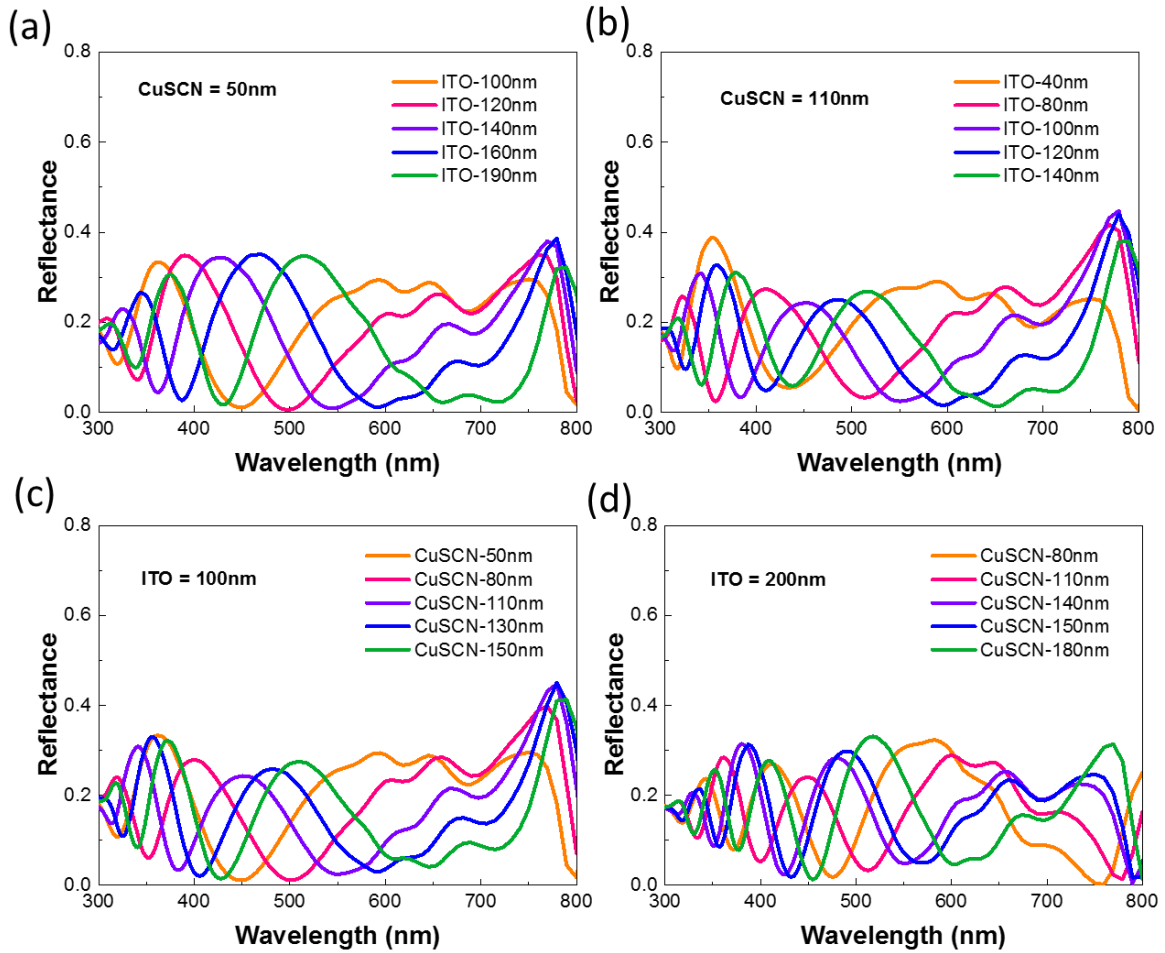

**Figure S9:** The reflectance spectra of the simulated CuSCN ST-PSCs with orange, pink, purple, blue and green color respectively, for (a) CuSCN = 50nm, with different ITO thickness, (b) CuSCN = 110nm, with different ITO thickness; (c) ITO = 100nm, with different CuSCN thickness, and (d) ITO = 200nm, with different CuSCN thickness.



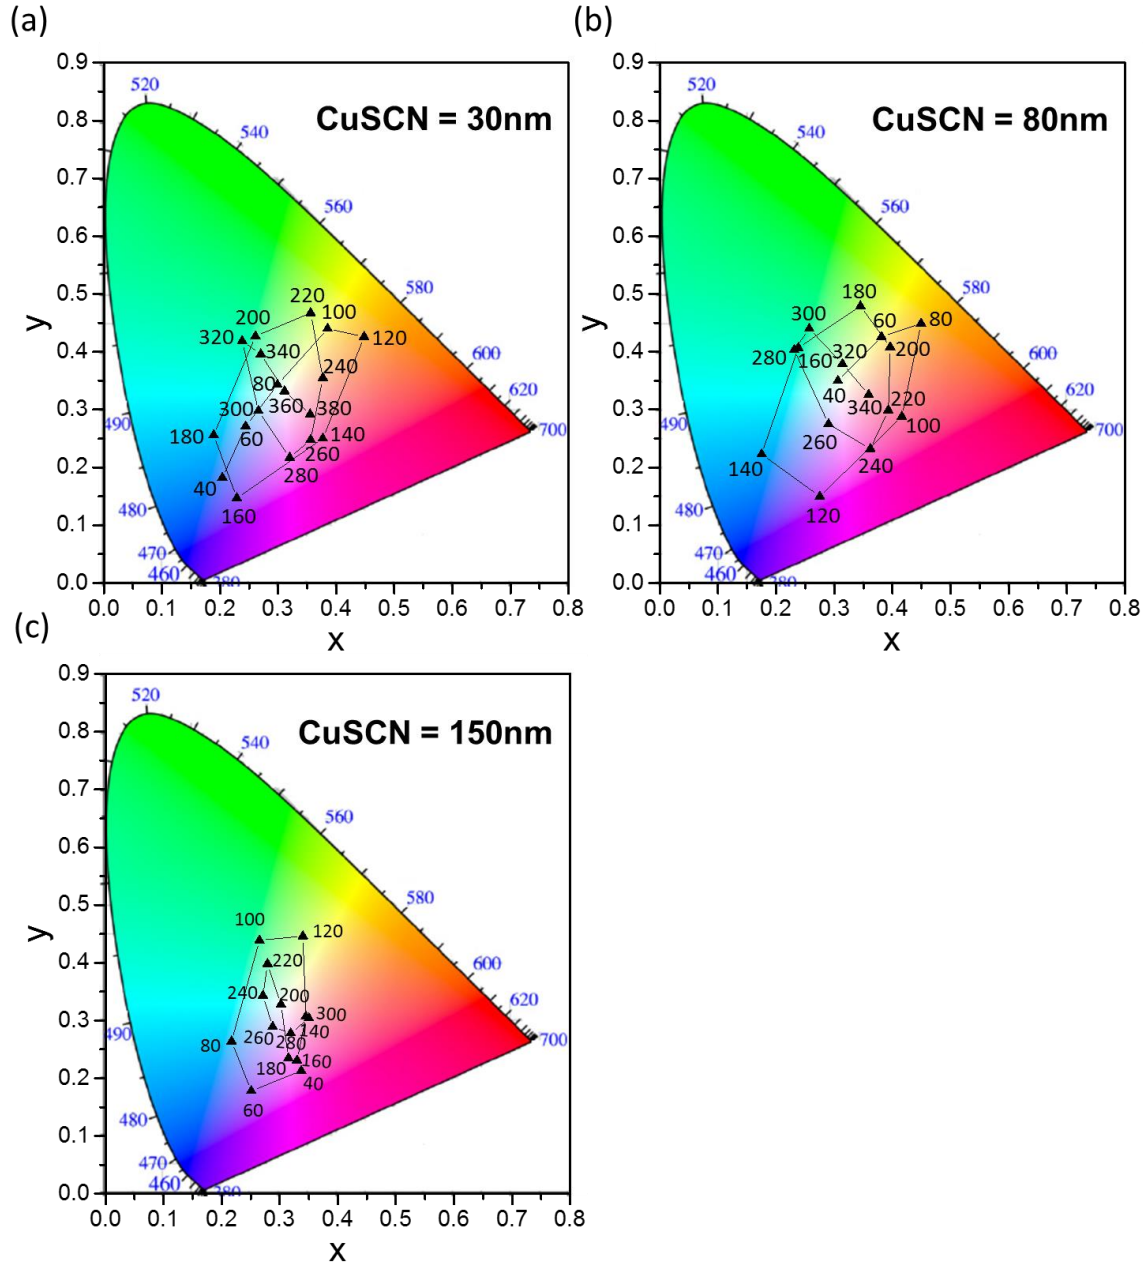

**Figure S10:** Color coordinates (x, y) representation in the CIE 1931 chromaticity diagram of optical simulated light reflectance spectra of CuSCN ST-PSCs from ITO electrode side based on a fixed bottom layer stack: FTO(400nm)/TiO<sub>2</sub>(50nm)/Perovskite(500nm)/CuSCN/ITO. (a) CuSCN = 30nm, with different ITO thickness. (b) CuSCN = 80nm, with different ITO thickness. (c) CuSCN = 150nm, with different ITO thickness.

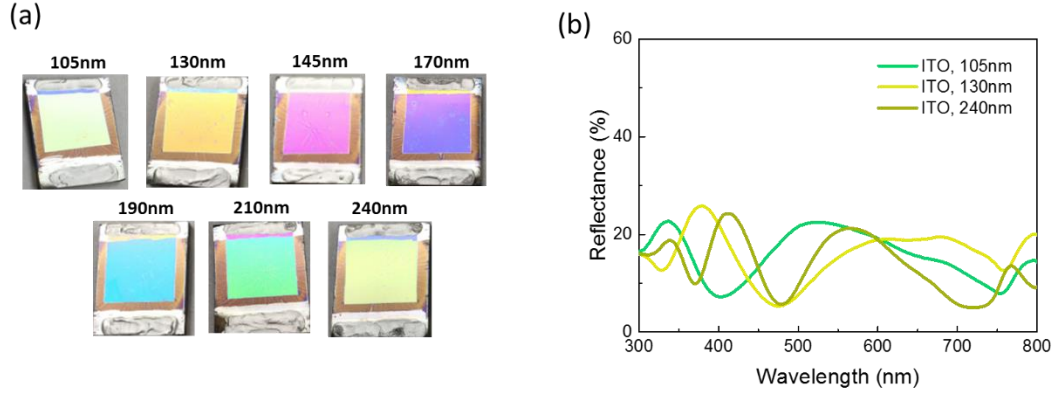

**Figure S11:** (a) Photographs of fabricated CuSCN-based colourful ST-PSCs with different ITO thicknesses, showing various physical colour against indoor LED light (photo taken from ITO side). (b) The reflectance spectra of the cells with ITO thickness of 105nm (green-yellow), 130nm (yellow-brown), 240nm (yellow-green) and 320nm (pink-purple).

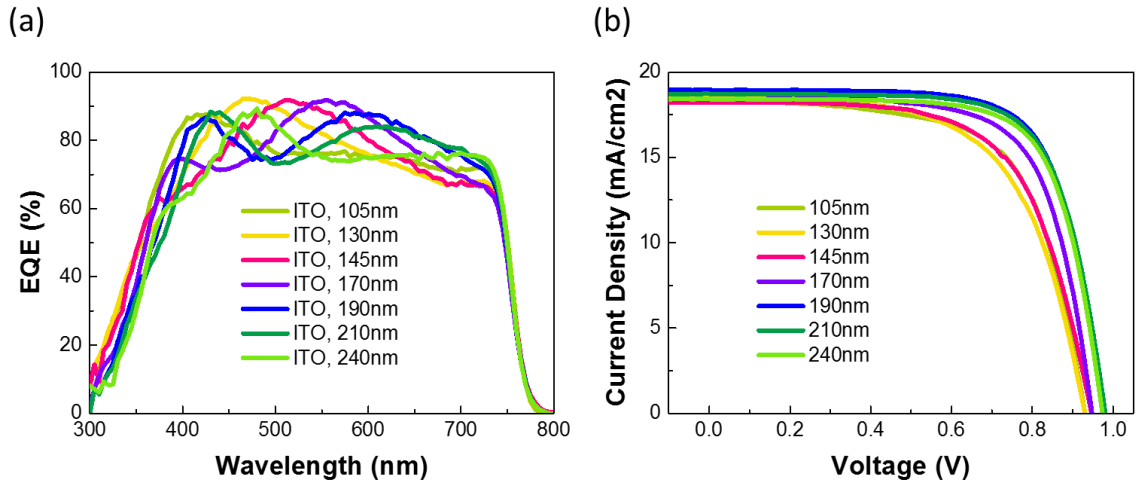

**Figure S12:** (a) Back EQE spectra and (b) Current-voltage characteristics of bifacial ST-PSC when illuminated through ITO side for various ITO thicknesses.

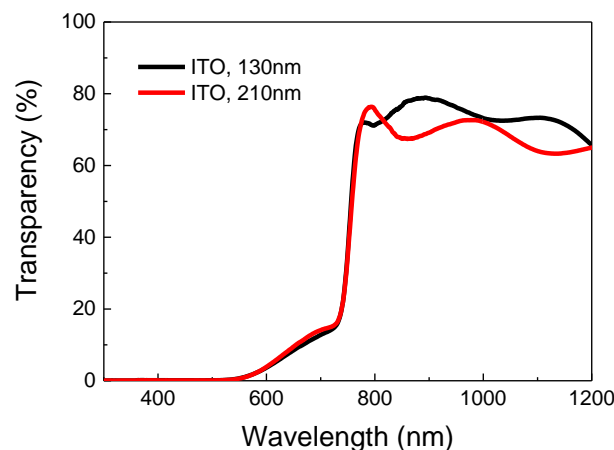

**Figure S13:** Transmission spectra of CuSCN ST-PSCs full device with rear ITO electrode of two different thickness of 130 nm and 210 nm.

## References

1. Deng, Y., et al., *Vividly Colorful Hybrid Perovskite Solar Cells by Doctor-blade Coating with Perovskite Photonic Nanostructures*. *Materials Horizons*, 2015. **2**(6): p. 578-583.
2. Zhang, W., et al., *Highly Efficient Perovskite Solar Cells with Tunable Structural Color*. *Nano Letters*, 2015. **15**(3): p. 1698-1702.
3. Schliske, S., et al., *Design and Color Flexibility for Inkjet-Printed Perovskite Photovoltaics*. *ACS Applied Energy Materials*, 2019. **2**(1): p. 764-769.
4. Lee, K.-T., et al., *Highly Efficient Colored Perovskite Solar Cells Integrated with Ultrathin Subwavelength Plasmonic Nanoresonators*. *Scientific Reports*, 2017. **7**(1): p. 10640.
5. Eperon, G.E., et al., *Neutral Color Semitransparent Microstructured Perovskite Solar Cells*. *ACS Nano*, 2014. **8**(1): p. 591-598.
6. Upama, M.B., et al., *Low-temperature Processed Efficient and Colourful Semitransparent Perovskite Solar cells for Building Integration and Tandem Applications*. *Organic Electronics*, 2019. **65**: p. 401-411.
7. Jung, J.W., C.-C. Chueh, and A.K.-Y. Jen, *High-Performance Semitransparent Perovskite Solar Cells with 10% Power Conversion Efficiency and 25% Average Visible Transmittance Based on Transparent CuSCN as the Hole-Transporting Material*. *Advanced Energy Materials*, 2015. **5**(17): p. 1500486.
8. Lee, K.-T., et al., *Colored, See-through Perovskite Solar Cells Employing an Optical Cavity*. *Journal of Materials Chemistry C*, 2015. **3**(21): p. 5377-5382.
9. Lu, J.-H., et al., *High-Performance, Semitransparent, Easily Tunable Vivid Colorful Perovskite Photovoltaics Featuring Ag/ITO/Ag Microcavity Structures*. *The Journal of Physical Chemistry C*, 2016. **120**(8): p. 4233-4239.
10. Lee, K.-T., et al., *Incident-angle-controlled Semitransparent Colored Perovskite Solar cells with Improved Efficiency Exploiting a Multilayer Dielectric Mirror*. *Nanoscale*, 2017. **9**(37): p. 13983-13989.

11. Lee, K.-T., et al., *High-performance Colorful Semitransparent Perovskite Solar Cells with Phase-compensated Microcavities*. Nano Research, 2018. **11**(5): p. 2553-2561.
12. Jiang, Y., et al., *Efficient Colorful Perovskite Solar Cells Using a Top Polymer Electrode Simultaneously as Spectrally Selective Antireflection Coating*. Nano Letters, 2016. **16**(12): p. 7829-7835.
13. Ramírez Quiroz, C.O., et al., *Coloring Semitransparent Perovskite Solar Cells via Dielectric Mirrors*. ACS Nano, 2016. **10**(5): p. 5104-5112.
